# Supplementary material
Source: publisher figshare collection journal article supplement (https://gsapubs.figshare.com/articles/dataset/_/12532163)
Supplement: Supplementary file 1 [file 1]

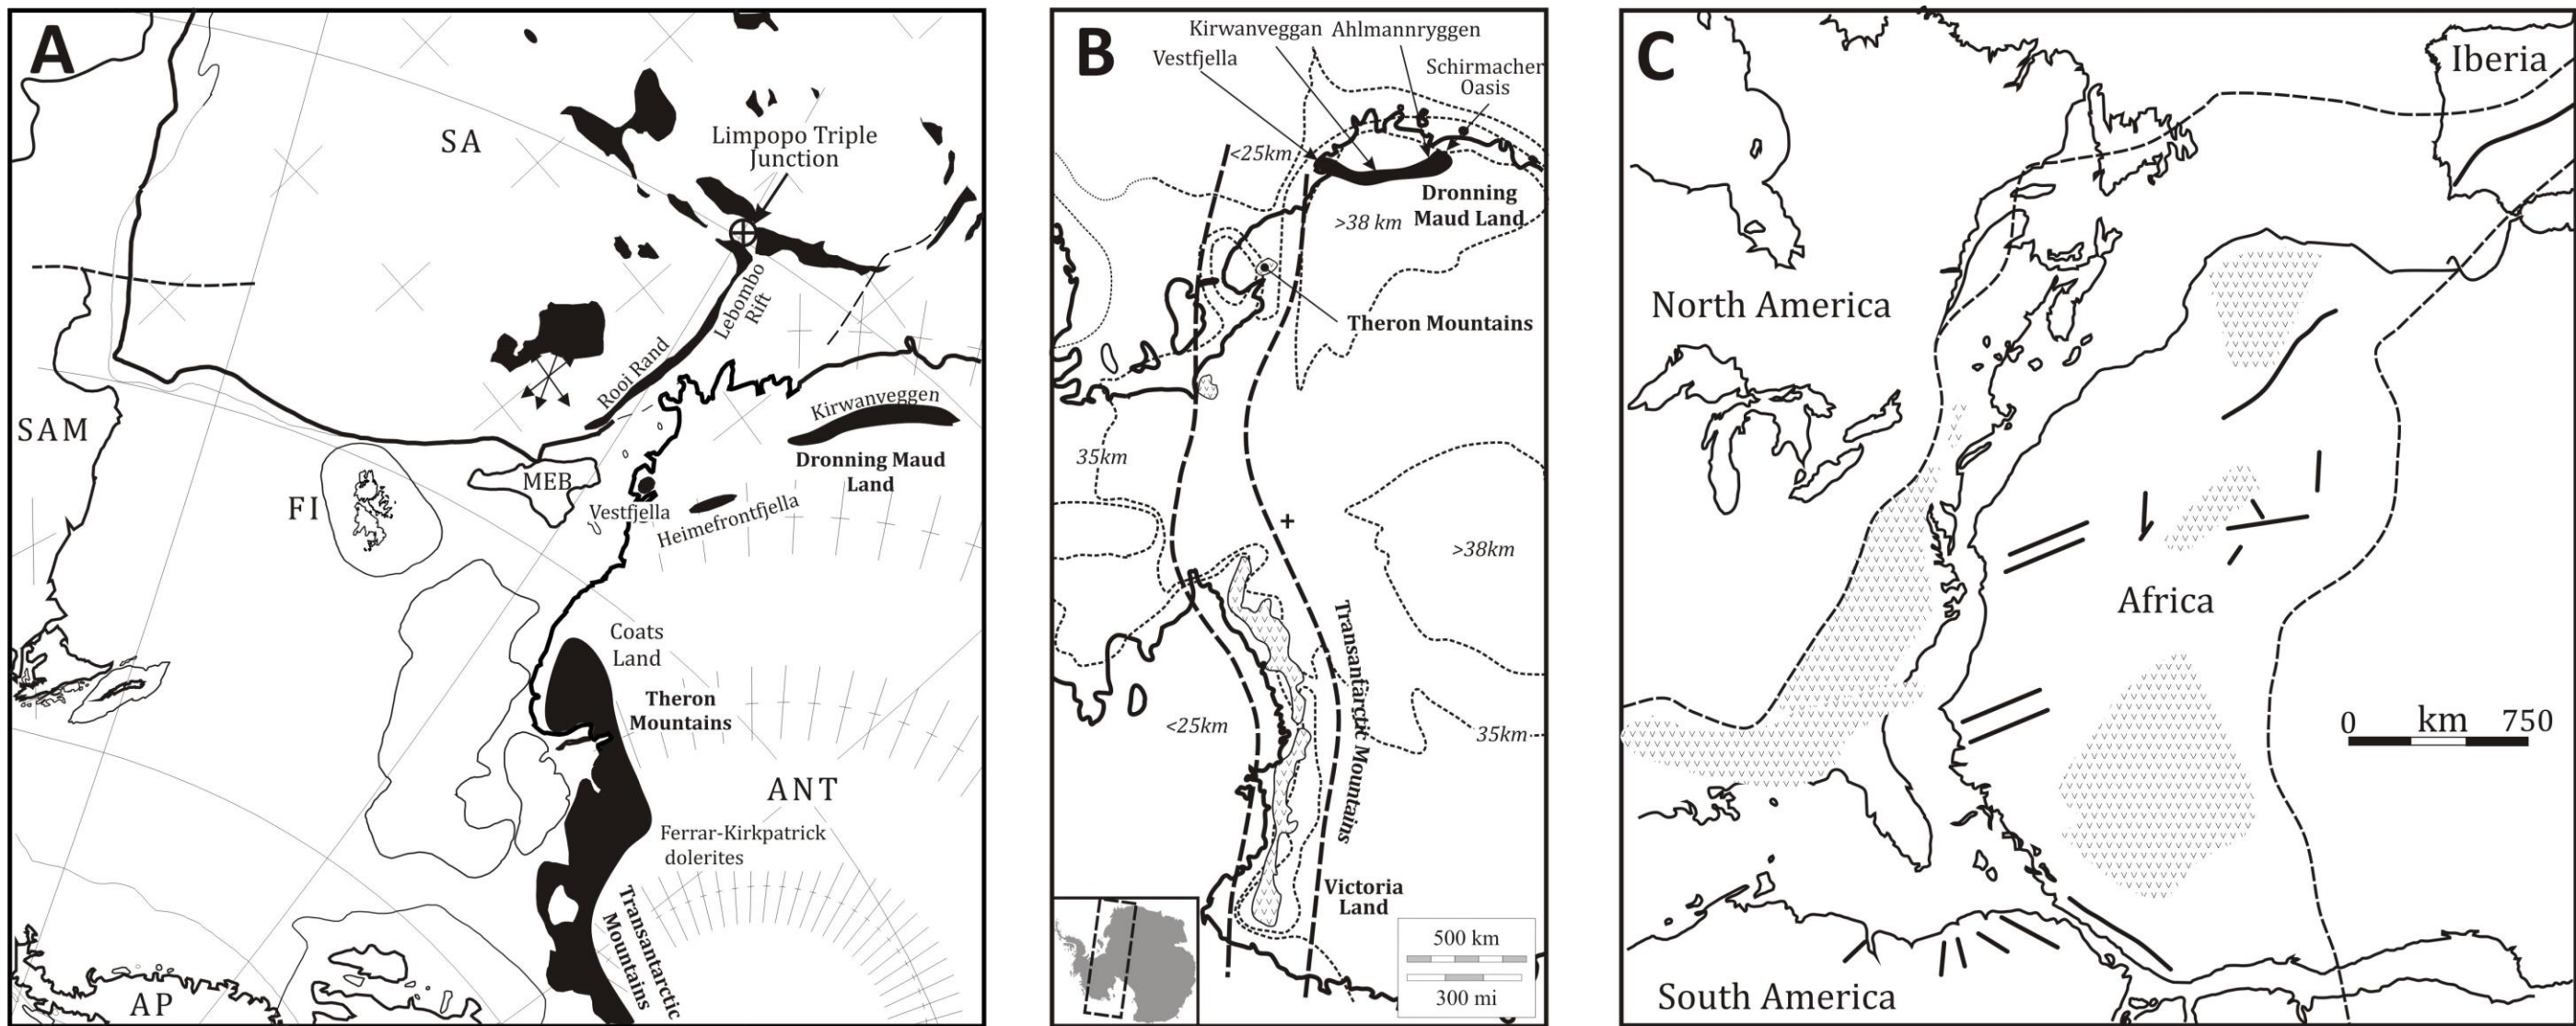

Sketch maps showing the locations of the main igneous centres mentioned in the text. **A)** Locations of the main Jurassic igneous rocks (black shading) of Antarctica and Southern Africa. FI, Falkland Islands; MEB, Maurice Ewing Bank; SAM, South American plate; SA, African plate; ANT, Antarctic plate. After Macdonald et al. (2003)<sup>1</sup>. **B)** Distribution of volcanic rocks of the Ferrar Large Igneous Province ('V' symbol; Transantarctic Mountains) and Dronning Maud Land (black shading) in Antarctica. The bold pecked lines give the approximate limit of the FLIP, and the finer pecked lines are contours to the Moho with depth given in km in italics. Inset shows the position of the FLIP relative to Antarctica. After Elliot (2013). **C)** Area occupied by the Central Atlantic Magmatic Province. The pecked lines give the approximate limit of the CAMP, and solid lines general azimuth of dyke swarms. After Grossman et al. (1991).

<sup>1</sup> Macdonald, D.I.M., Gomez-Perez, I., Frnazese, J., Spalleti, L., Lawver, L., Gahagan, L., Dalziel, I.W.D., Thomas, C.J., Trewin, N.H., Hole, M.J. and Paton, D., 2003, Mesozoic break-up of SW Gondwana: implications for regional hydrocarbon potential of the southern South Atlantic. *Marine & Petroleum Geology*, v. 20, p. 287-308, doi:10.1016/S0264-8172(03)00045-X

## Table DR1

### References to data sources.

BERTRAND H., MILLOT G.; CONTINENTAL THOLEIITIC MAGMATISM OF THE IBERIAN MARGIN, PRECURSOR OF THE OPENING OF CENTRAL ATLANTIC: THE DOLERITES OF THE MESSEJANA-PLASENCIA DYKE (PORTUGAL-SPAIN) ; COMPT. REND. ACAD. SCI. PARIS SER. 2A 304 [1987] 215-220

BREWER T.S., HERGT J.M., HAWKESWORTH C.J., REX D.C., STOREY B.C.; COATS LAND DOLERITES AND THE GENERATION OF ANTARCTIC CONTINENTAL FLOOD BASALTS ; SPEC. PUBL. GEOL. SOC. LONDON 68 [1992] 185-208

CEBRIA J.-M., LOPEZ RUIZ J., DOBLAS M., MARTINS L.T., MUNHA J.; GEOCHEMISTRY OF THE EARLY JURASSIC MESSEJANA-PLASENCIA DYKE (PORTUGAL-SPAIN); IMPLICATIONS ON THE ORIGIN OF THE CENTRAL ATLANTIC MAGMATIC PROVINCE ; J. PETROL. 44 [2003] 547-568

ELLAM R.M., COX K.G.; A PROTEROZOIC LITHOSPHERIC SOURCE FOR KAROO MAGMATISM: EVIDENCE FROM THE NUANETSI PICRITES ; EARTH PLANET. SCI. LETT. 92 [1989] 207-218

GROSSMAN J.N., GOTTFRIED D., FROELICH A.J.; GEOCHEMICAL DATA FOR JURASSIC DIABASE ASSOCIATED WITH EARLY MESOZOIC BASINS IN THE EASTERN UNITED STATES ; U. S. GEOL. SURV. OPEN FILE REPT. 91-322-J [1991]

GUNN B.M.; MODAL AND ELEMENT VARIATION IN ANTARCTIC THOLEIITES ; GEOCHIM. COSMOCHIM. ACTA 30 [1966] 881-920

HARMER R.E., LEE C.A., EGLINGTON B.M.; A DEEP MANTLE SOURCE FOR CARBONATITE MAGMATISM: EVIDENCE FROM THE NEPHELINITES AND CARBONATITES OF THE BUHERA DISTRICT, SE ZIMBABWE ; EARTH PLANET. SCI. LETT. 158 [1998] 131-142

HEINONEN J.S., CARLSON R.W., LUTTINEN A.V.; ISOTOPIC (SR, ND, PB, AND OS) COMPOSITION OF HIGHLY MAGNESIAN DIKES OF VESTFJELLA, WESTERN DRONNING MAUD LAND, ANTARCTICA: A KEY TO THE ORIGINS OF THE JURASSIC KAROO LARGE IGNEOUS PROVINCE? ; CHEM. GEOL. 277 [2010] 227-244

HEINONEN J.S., LUTTINEN A.V.; MINERAL CHEMICAL EVIDENCE FOR EXTREMELY MAGNESIAN SUBALKALINE MELTS FROM THE ANTARCTIC EXTENSION OF THE KAROO LARGE IGNEOUS PROVINCE; MIN. PETROL. 99 [2010] 201-217

KEIDING J.K., TRUMBULL R.B., VEKSLER I.V., JERRAM D.A.; ON THE SIGNIFICANCE OF ULTRA-MAGNESIAN OLIVINES IN BASALTIC ROCKS ; GEOLOGY 39 [2011] 1095-1098

LUTTINEN A.V., FURNES H.; FLOOD BASALTS OF VESTFJELLA: JURASSIC MAGMATISM ACROSS AN ARCHAEOAN-PROTEROZOIC LITHOSPHERIC BOUNDARY IN DRONNING MAUD LAND, ANTARCTICA ; J. PETROL. 41 [2000] 1271-1305

MARSH J.S., EWART A., MILNER S.C., DUNCAN R.A., MILLER R. MCG.; THE ETENDEKA IGNEOUS PROVINCE: MAGMA TYPES AND THEIR STRATIGRAPHIC DISTRIBUTION WITH IMPLICATIONS FOR THE EVOLUTION OF THE PARANA-ETENDEKA FLOOD BASALT PROVINCE ; BULL. VOLCANOL. 62 [2001] 464-486

MARSH J.S., MILNER S.C.; STRATIGRAPHIC CORRELATION OF THE AWAHAB AND TAFELBERG FORMATIONS, ETENDEKA GROUP, NAMIBIA, AND LOCATION OF AN ERUPTIVE SITE FOR FLOOD BASALT VOLCANISM ; J. AFR. EARTH SCI. 48 [2007] 329-340

MARTINS L.T., MADEIRA J., YOUNG N., MUNHA J., MATA J., KERRICH R.; RIFT-RELATED MAGMATISM OF THE CENTRAL ATLANTIC MAGMATIC PROVINCE IN ALGARVE, SOUTHERN PORTUGAL ; LITHOS 101 [2008] 102-124

RILEY T.R., CURTIS M.L., LEAT P.T., WATKEYS M.K., DUNCAN R.A., MILLAR I.L., OWENS W.H.; OVERLAP OF KAROO AND FERRAR MAGMA TYPES IN KWAZULU-NATAL, SOUTH AFRICA ; J. PETROL. 47 [2006] 541-566

STARKEY N.A., STUART F.M., ELLAM R.M., FITTON J.G., BASU S., LARSEN L.M.; HELIUM ISOTOPES IN EARLY ICELAND PLUME PICRITES: CONSTRAINTS ON THE COMPOSITION OF HIGH  $^3\text{He}/^4\text{He}$  MANTLE ; EARTH PLANET. SCI. LETT. 277 [2009] 91-100

SUSHCHEVSKAYA N.M., BELYATSKII B.V., LEICHENKOV G.L., LAIBA A.A.; EVOLUTION OF THE KAROO-MAUD MANTLE PLUME IN ANTARCTICA AND ITS INFLUENCE ON THE MAGMATISM OF THE EARLY STAGES OF INDIAN OCEAN OPENING ; GEOCHEM. INT. 47 [2009] 1-17

THOMPSON R.N., GIBSON S.A., DICKIN A.P., SMITH P.M.; EARLY CRETACEOUS BASALT AND PICRITE DYKES OF THE SOUTHERN ETENDEKA REGION, NW NAMIBIA: WINDOWS INTO THE ROLE OF THE TRISTAN MANTLE PLUME IN PARANA-ETENDEKA MAGMATISM ; J. PETROL. 42 [2001] 2049-2081

THOMPSON R.N., RICHES A.J.V., ANTOSHECHKINA P.M., PEARSON D.G., NOWELL G.M., OTTLEY C.J., DICKIN A.P., HARDS V.L., NGUNO A.-K., NIKU-PAAVOLA V. ; ORIGIN OF CFB MAGMATISM: MULTI-TIERED INTRACRUSTAL PICRITE-RHYOLITE MAGMATIC PLUMBING AT SPITZKOPPE, WESTERN NAMIBIA, DURING EARLY CRETACEOUS ETENDEKA MAGMATISM ; J. PETROL. 48 [2007] 1119-1154

TRUMBULL R.B., REID D.L., DE BEER C., VAN ACKEN D., ROMER R.L. ; MAGMATISM AND CONTINENTAL BREAKUP AT THE WESTERN MARGIN OF SOUTHERN AFRICA: A GEOCHEMICAL COMPARISON OF DOLERITE DIKES FROM NORTHWESTERN NAMIBIA AND THE WESTERN CAPE ; S. AFR. J. GEOL. 110 [2007] 477-502

WILHELM S., WÖRNER G. ; CRYSTAL SIZE DISTRIBUTION IN JURASSIC FERRAR FLOWS AND SILLS (VICTORIA LAND, ANTARCTICA): EVIDENCE FOR PROCESSES OF COOLING, NUCLEATION, AND CRYSTALLIZATION ; CONTRIB. MINERAL. PETROL. 125 [1996] 1-15

ZAVALA K., LEITCH A.M., FISHER G.W. ; SILICIC SEGREGATIONS OF THE FERRAR DOLERITE SILLS, ANTARCTICA ; J. PETROL. 52 [2011] 1927-1964
